# Supplementary material for: Attitudes and practices of researchers on the sharing of genomic data: a qualitative study in Uganda
Source: Springer Nature journal article supplement (doi:10.1186/s12910-026-01386-7), 2026-01-29
Supplement: MOESM1 [file 12910_2026_1386_MOESM1_ESM.docx]

**Regulation of data sharing in international collaborative genomics research**

**We are going to talk about willingness to share genomic data**

Introduction;

1. **An overview of genetics/genomics research**
2. What is your understanding of genomic research?
3. How long have you been involved in genomics research?
4. What could be the benefits of genomic testing to research participants?
5. What are some of the possible risks of genomic research?
6. What type of data do you deal in?
7. Where is the data stored?
8. **Data sharing in genomic research**
9. Would you kindly tell me of what your understanding of data sharing in genomic research is?
10. Have you ever shared genomic data?
11. Can you kindly share your experience of participation in data sharing in genomic research?
12. How would you describe your experience in the sharing of genomic data?
13. **Willingness to share genomic data**
14. Would you be willing to share genomic data?
15. What are some of the factors that would influence your positive willingness to share data? (probe for benefits of sharing data)
16. Would you be willing to share data with conditions? (Yes/No)
17. Would you kindly share some of the conditions you would consider in the sharing of genomic data?
18. What concerns would make you hesitant to share genomic data?
19. **Practice in the sharing of genomic data**
20. Would you kindly share your practice in the sharing of genomic data?
21. Would you kindly share how the data is shared? Probe for platforms for sharing genomic data
22. What are some of the resources and capacity that you have that influence the sharing of genomic data?
23. Are you aware of any policies and guidelines that guide the sharing of genomic data?

**Thank you**
